# Supplementary material
Source: PubMed Central journal article supplement (PMC4933002)
Supplement: f-72-00523-sup1.pdf [file f-72-00523-sup1.pdf]

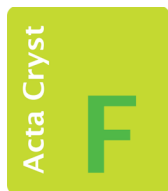

STRUCTURAL BIOLOGY  
COMMUNICATIONS

**Volume 72 (2016)**

**Supporting information for article:**

**Crystal structure of truncated aspartate transcarbamoylase from  
*Plasmodium falciparum***

**Sergey Lunev, Soraya S. Bosch, Fernando de Assis Batista, Carsten Wrenger  
and Matthew R. Groves**

**Table S1** Macromolecule production information (Full-length *Pf*ATC)

The cloning details for the full version of *Pf*ATC. *Bsa*I restriction sites in both primers are underlined. Predicted apicoplast targeting sequence (PlasmoAP, (Foth et al., 2005)) is also underlined. Predicted cleavage site (IRT-KK) is highlighted. Additional Strep-tag residues at the C-terminus are shown in bold italic.

|                                                        |                                                                                                                                                                                                                                                                                                                                                                                                                                                                           |
|--------------------------------------------------------|---------------------------------------------------------------------------------------------------------------------------------------------------------------------------------------------------------------------------------------------------------------------------------------------------------------------------------------------------------------------------------------------------------------------------------------------------------------------------|
| Source organism                                        | <i>Plasmodium falciparum</i> strain 3D7                                                                                                                                                                                                                                                                                                                                                                                                                                   |
| DNA source                                             | cDNA generated from total RNA via reverse transcriptase PCR                                                                                                                                                                                                                                                                                                                                                                                                               |
| Forward primer ( <i>Bsa</i> I)                         | 5'-GCGCGC <u>GGTCTC</u> CAATGATTGAAATATTTTGC ACTGC-3'                                                                                                                                                                                                                                                                                                                                                                                                                     |
| Reverse primer ( <i>Bsa</i> I)                         | 5'-GCGCGC <u>GGTCTC</u> CGCGCTGCTAGTTGATGAAAAAATGAG-3'                                                                                                                                                                                                                                                                                                                                                                                                                    |
| Expression vector                                      | pASK-IBA3                                                                                                                                                                                                                                                                                                                                                                                                                                                                 |
| Expression host                                        | <i>Escherichia coli</i>                                                                                                                                                                                                                                                                                                                                                                                                                                                   |
| Complete amino acid sequence of the construct produced | <p><u>MIEIFCTAIVVITILIVGVFVYMI</u> <b>IRTKK</b> KKLKLDNMFYINSKYKIDLDKI<br/> MTKMKNKSVINIDDVDDEELLAILYTSKQFEKILKNNEDSKYLENKVFCVS<br/> FLEPSTRTRCSFDAAILKLGSKVLNITDMNSTSFYKGETVEDAFKILSTYV<br/> DGI IYRDPSKKNVDIAVSSSSKPIINAGNGTGEHPTQSLLDFYTIHNYFPF<br/> ILDNRNINKKLNIAFVGDLKNGRTVHLSKLLSRYNVSFNFVSCKSLNIPKD<br/> IVNTITYNLKKNFYSDDSIKYFDNLEEGLEDVHI IYMTRIQKERFTDVDE<br/> YNQYKNAFILSNKTLNTRDDTKILHPLPRVNEIKVEVDSNPKSVYFTQAE<br/> NGLYVRMALLYLIFSSTS <b>SAWHPQFEK</b></p> |
